# Supplementary material
Source: PubMed Central journal article supplement (PMC5845758)
Supplement: NIHMS939898-supplement-2.pdf [file NIHMS939898-supplement-2.pdf]

# A. Example of Aperio Imaging Analysis

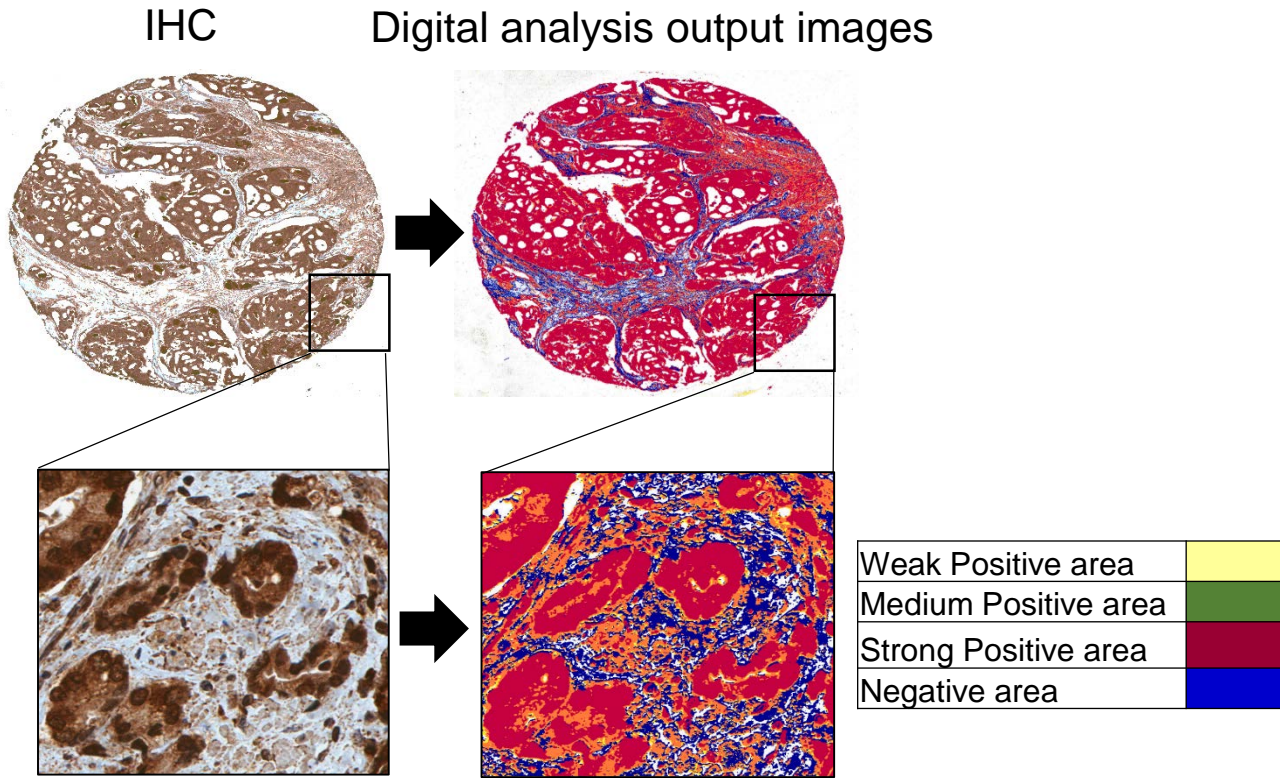

# B.

| Algorithm Inputs                         | Algorithm Inputs |
|------------------------------------------|------------------|
| Pixel Area (millimeter-squared)          | 6.08609e-008     |
| Hue Value (Center)                       | 0.1              |
| Hue Width                                | 0.5              |
| Color Saturation Threshold               | 4.e-002          |
| Intensity Threshold WEAK (Upper Limit)   | 220              |
| Intensity Threshold WEAK (Lower Limit)   | 175              |
| Intensity Threshold MEDIUM (Upper Limit) | 175              |
| Intensity Threshold MEDIUM (Lower Limit) | 100              |
| Intensity Threshold STRONG (Upper Limit) | 100              |
| Intensity Threshold STRONG (Lower Limit) | 0                |
| Intensity Threshold Negative Pixels      | -1               |

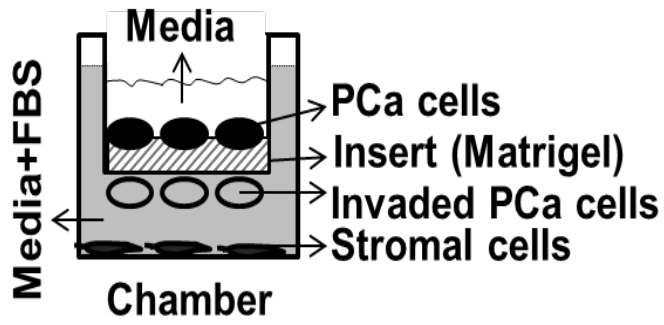

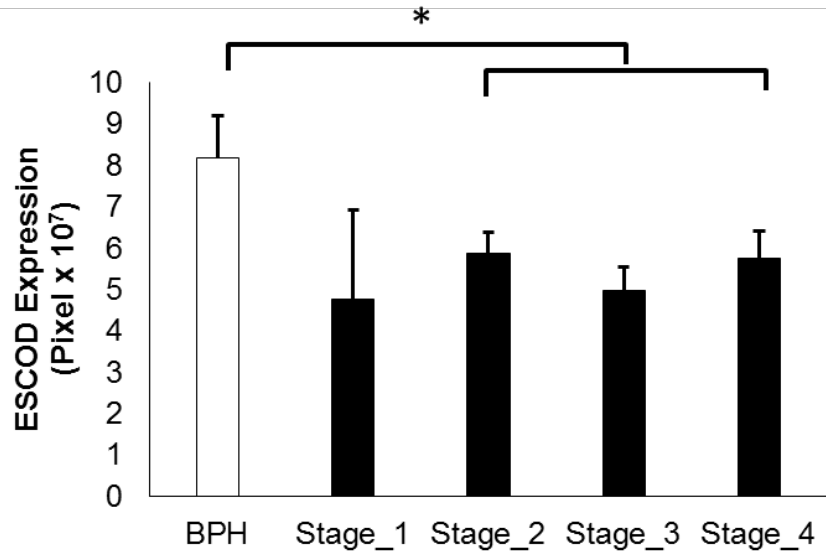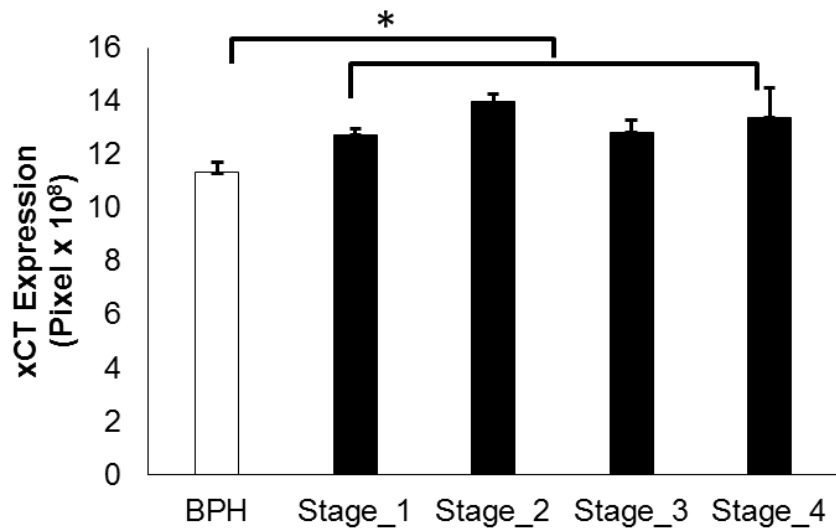

### Grasso Data Set

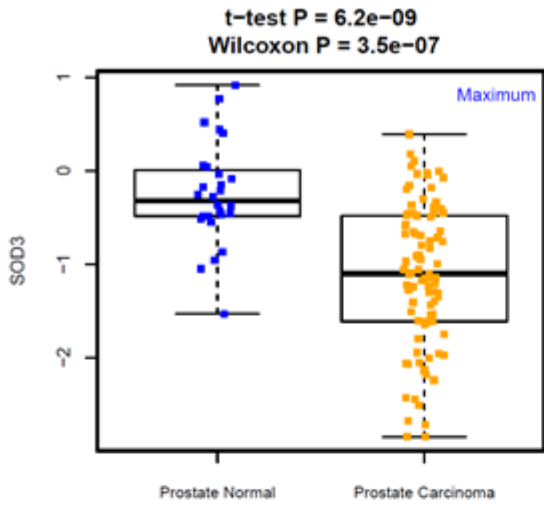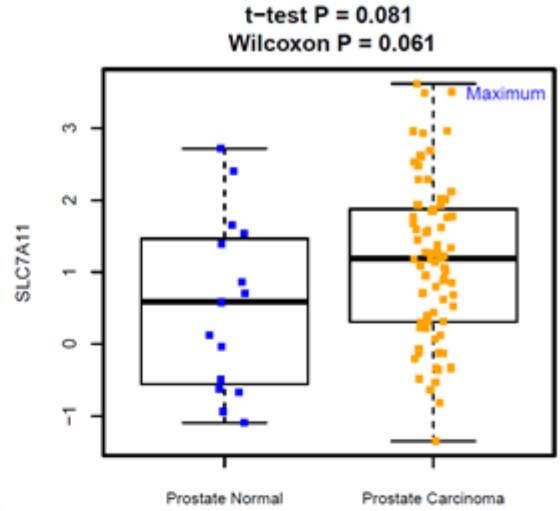

### Taylor Data Set

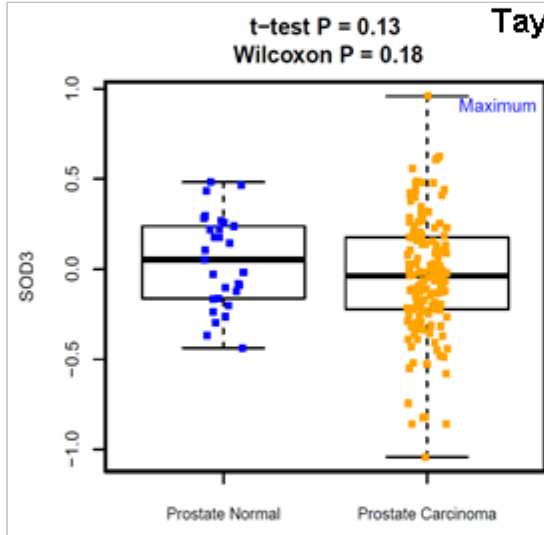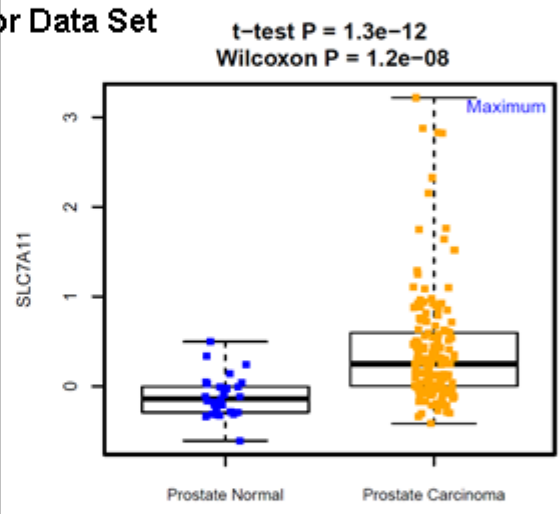

### Yu Data Set

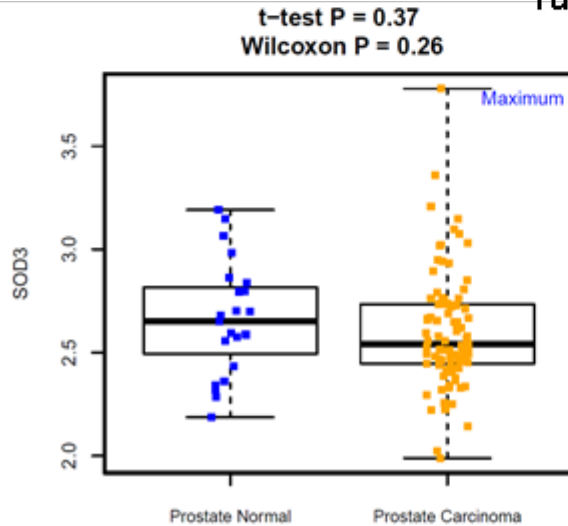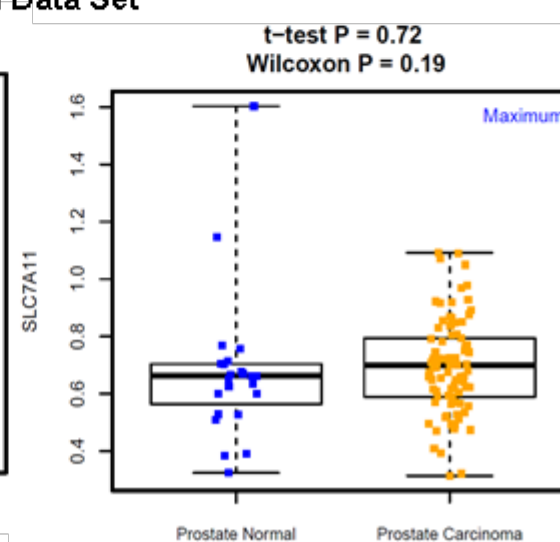

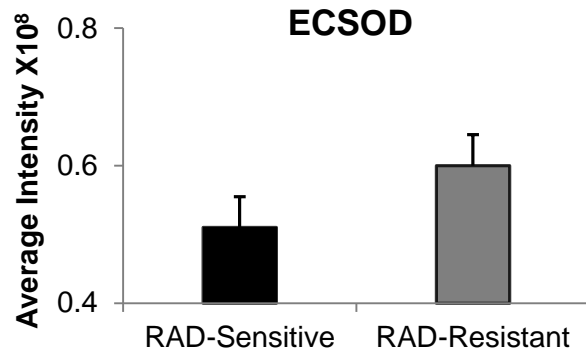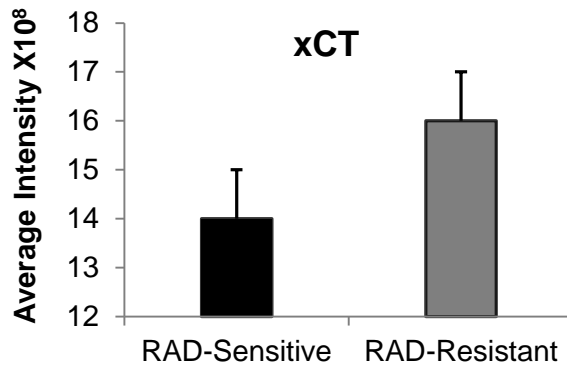

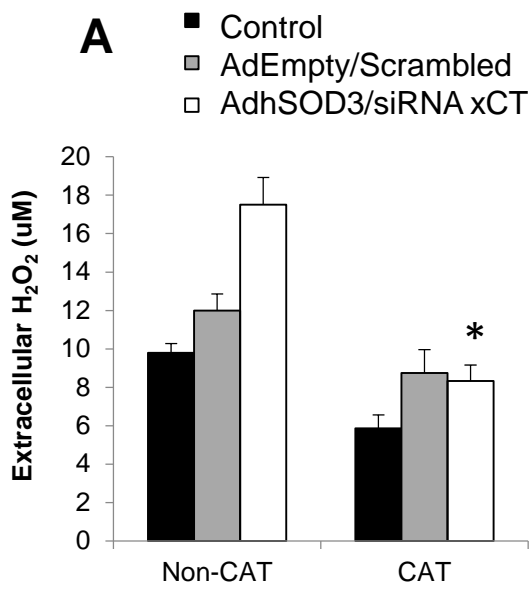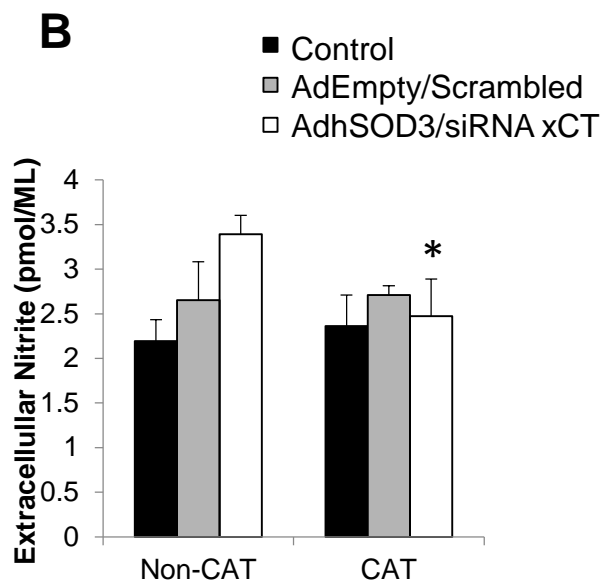

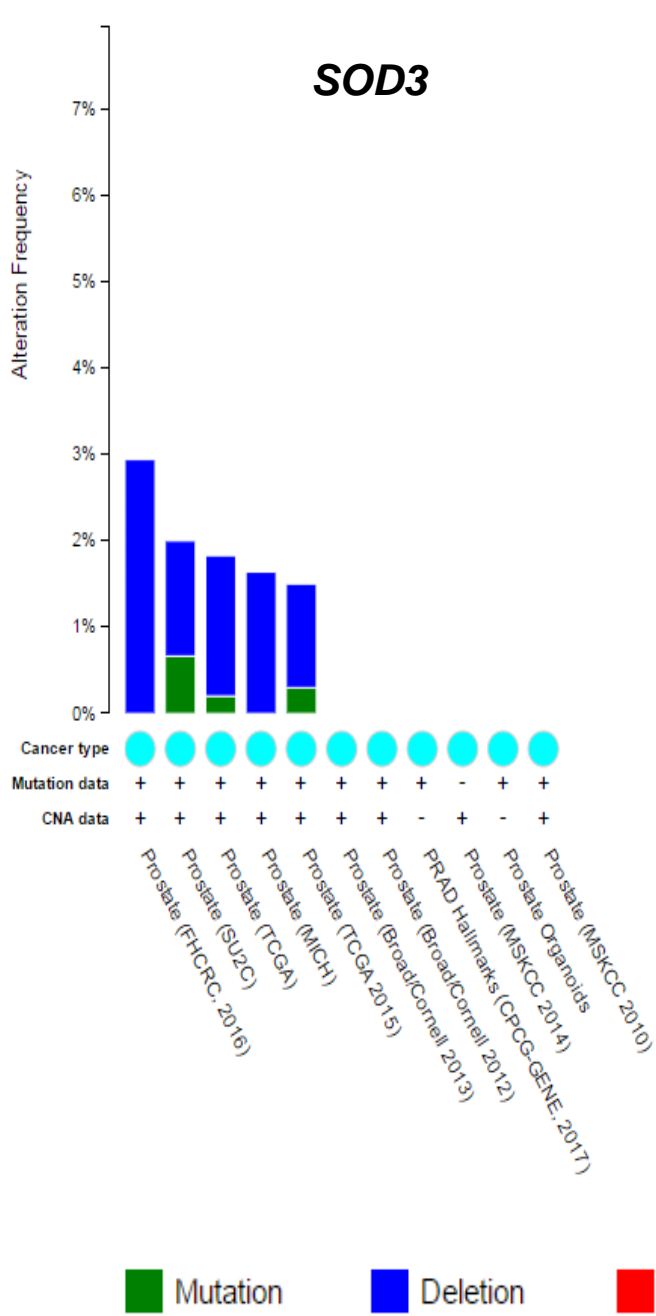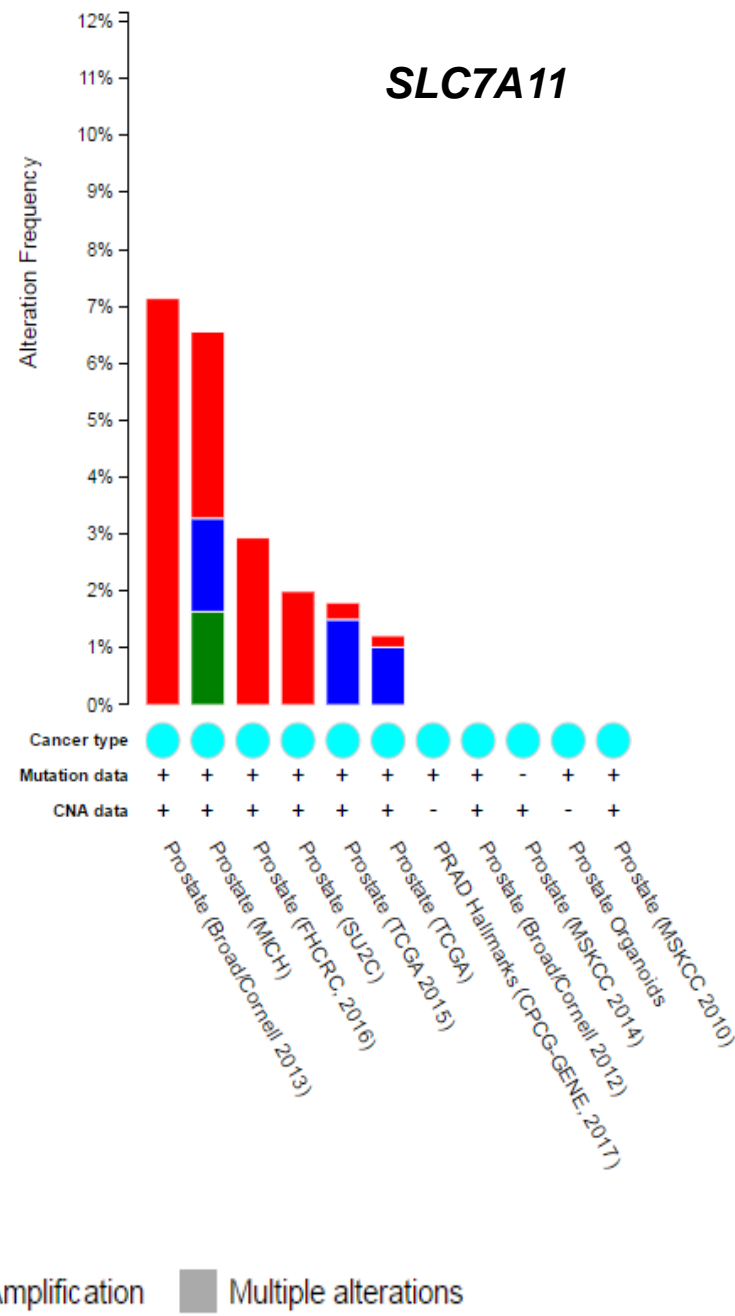

Supplementary Fig.7
